# Supplementary material for: Galectin-3 enhances neutrophil motility and extravasation into the airways during Aspergillus fumigatus infection
Source: PubMed Central journal article supplement (PMC7428289; doi:10.1371/journal.ppat.1008741), 2020-08-04

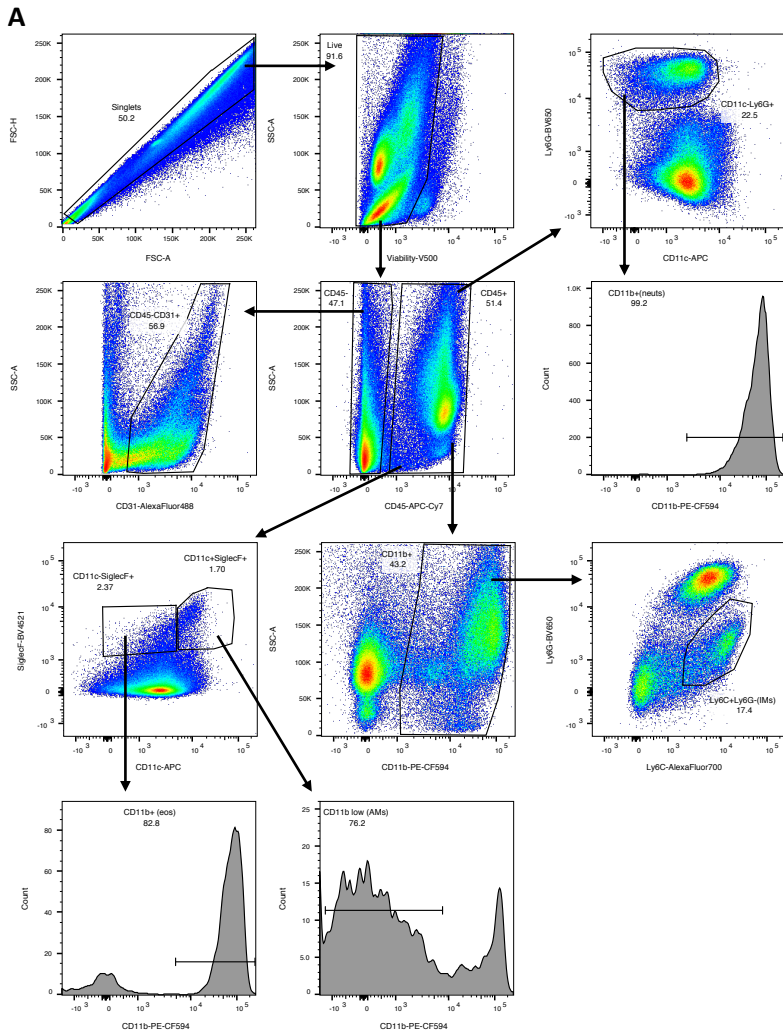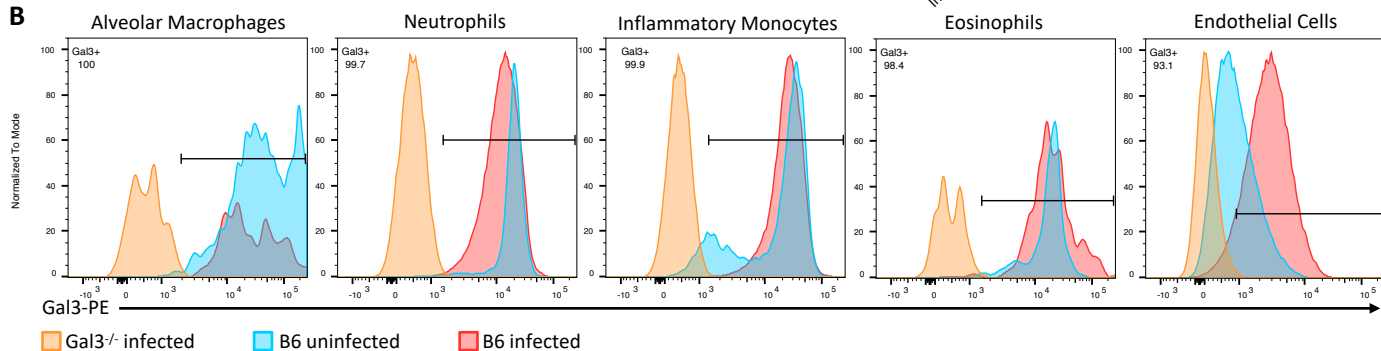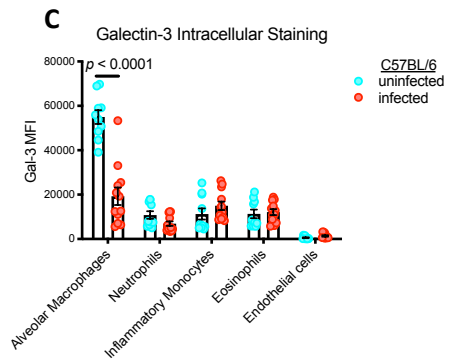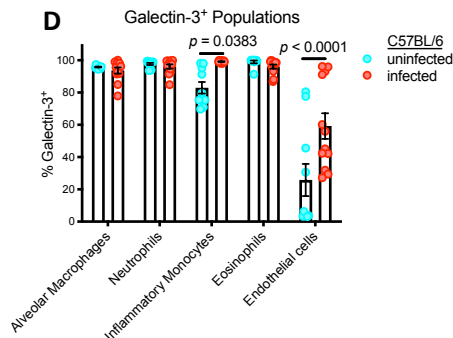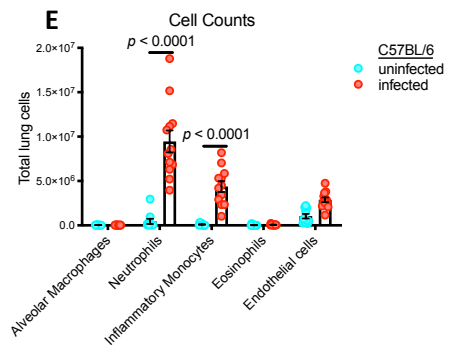

Supplement: ppat.1008741.s001.pdf [file ppat.1008741.s001.pdf]
