# Supplementary material for: Galectin-3 enhances neutrophil motility and extravasation into the airways during Aspergillus fumigatus infection
Source: PubMed Central journal article supplement (PMC7428289; doi:10.1371/journal.ppat.1008741), 2020-08-04

**A**

Resting Conidia

Swollen Conidia

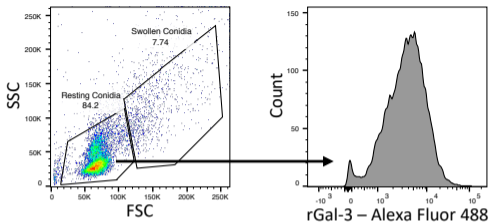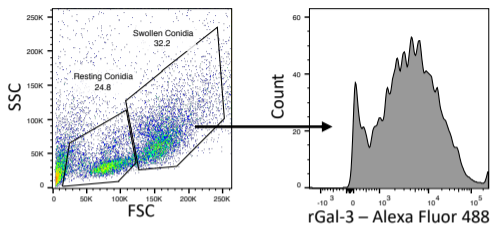**B**

Resting Conidia

Swollen Conidia

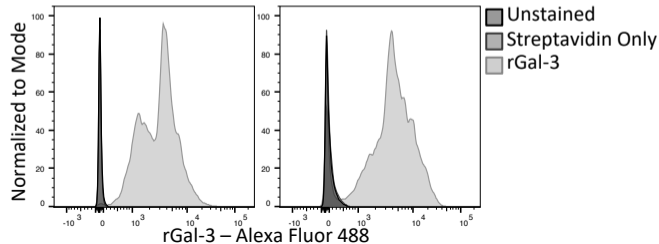**C**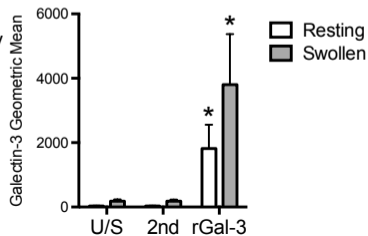

Supplement: ppat.1008741.s003.pdf [file ppat.1008741.s003.pdf]
